# Supplementary material
Source: PubMed Central journal article supplement (PMC6784517)
Supplement: baADV2019000175-suppl1.pdf [file baADV2019000175-suppl1.pdf]

**Table S1. Candidate 5hmC marker genes associated with cell-of-origin and clinical factors.**

| <b>Cell-of-origin</b> | <b>Stage</b> | <b>LDH</b>  | <b>IPI</b>     |
|-----------------------|--------------|-------------|----------------|
| FCGR3B                | COX6A2       | CCDC85B     | GPR33          |
| FOXD4L5               | SAAL1        | CLUAP1      | RP11-201K10.3  |
| TMEM189-UBE2V1        | PNPLA5       | GPR33       | XRCC6BP1       |
| KLB                   | WDR53        | HIRIP3      | HLA-DMA        |
| FAM27E2               | KCNK16       | LIMK2       | OR2AG2         |
| CDKN1C                | KRTAP5-1     | PPAN-P2RY11 | FAAP24         |
| PPP1R15B              | STX3         | SF3B3       | OR2M7          |
| HNF1B                 | VARS2        | TIMM10      | KRTAP5-6       |
| RP11-2C24.9           | ZNF780A      | TSRM        | PATL2          |
| PIIB                  | GMPPA        | HBZ         | TMEM98         |
| SIM1                  | CLCNKA       | EBPL        | C7orf34        |
| ZNF714                |              | MLX         | TRAF5          |
|                       |              | OR10AD1     | WDR53          |
|                       |              | ACADVL      | ZNF586         |
|                       |              | CDV3        | PGLYRP1        |
|                       |              | CLTB        | CLEC11A        |
|                       |              | COMMD7      | EXTL1          |
|                       |              | MSX1        | OR14A2         |
|                       |              | DEFB128     | SLIRP          |
|                       |              | OR51E2      | SPINK14        |
|                       |              | KCNK15      | SUPT4H1        |
|                       |              | ZNF347      | TMEM229B       |
|                       |              | GOLGA6D     | TMEM110-MUSTN1 |
|                       |              | SIRT7       | TRIM64         |
|                       |              | IFI35       | HINT1          |
|                       |              | OR10J5      | PRPSAP1        |
|                       |              | OR51E1      | ZNF165         |
|                       |              | AC002451.1  | CLUAP1         |
|                       |              | AC005549.3  | RPL3           |
|                       |              | TGIF1       | TESK1          |
|                       |              |             | IFI27L1        |
|                       |              |             | PCDHA1         |
|                       |              |             | RGP1           |
|                       |              |             | RGPD2          |

**Table S2. Candidate 5hmC marker genes associated with clinical events.**

| Gene          | coef         | se          | p.value     | Final.panel | Weight       |
|---------------|--------------|-------------|-------------|-------------|--------------|
| GBA2          | 16.58101577  | 4.835368979 | 0.000605562 |             |              |
| DEFB114       | 5.462832815  | 1.761051981 | 0.001921997 |             |              |
| OR5B17        | 7.498281506  | 2.435316773 | 0.002077135 | Yes         | -616.8557376 |
| OR4F5         | 6.295426926  | 2.121317699 | 0.003000405 | Yes         | -204.1811451 |
| SLC2A4        | -8.259417645 | 2.855225423 | 0.003819003 | Yes         | 215.9992279  |
| PSMC1         | -13.56757098 | 4.749550968 | 0.00428204  | Yes         | 166.0655279  |
| FOXN4         | -5.729336881 | 2.017540266 | 0.004514701 |             |              |
| ADAR          | 9.639517649  | 3.434831136 | 0.005009812 |             |              |
| GOLGA6B       | -5.801113462 | 2.077849505 | 0.005240224 |             |              |
| PCBD1         | 8.014550252  | 2.88084969  | 0.005402351 |             |              |
| NOTCH2NL      | 11.02107381  | 3.986823472 | 0.005703201 | Yes         | 486.568811   |
| CSHL1         | -11.7350525  | 4.30159151  | 0.006370565 |             |              |
| NDUFA2        | 9.033843164  | 3.34711914  | 0.006955014 |             |              |
| KPRP          | 6.838495606  | 2.576313819 | 0.007945615 |             |              |
| NKX6-2        | -5.190085771 | 1.969885275 | 0.008420802 |             |              |
| TMEM14B       | 22.4446283   | 8.551836408 | 0.008676635 | Yes         | -700.0771409 |
| OR5AS1        | 9.37019893   | 3.571072024 | 0.00869248  | Yes         | -155.7998525 |
| GEMIN5        | -9.972182361 | 3.801073206 | 0.008702696 |             |              |
| CCDC96        | 7.596740391  | 2.903739815 | 0.008891659 | Yes         | 1270.523469  |
| GSTK1         | 8.587706075  | 3.314476414 | 0.009570608 |             |              |
| SENP3-EIF4A1  | 5.746628801  | 2.222270744 | 0.009711764 |             |              |
| RRM2          | 9.970614358  | 3.885637467 | 0.010287359 | Yes         | 312.983027   |
| RRAGA         | 7.889135434  | 3.08276099  | 0.010493946 |             |              |
| IRF2BP2       | 6.558942595  | 2.566243702 | 0.010592775 |             |              |
| SYCE3         | -11.80253794 | 4.630112722 | 0.010800684 |             |              |
| MT1HL1        | 6.69623398   | 2.633642177 | 0.011003884 | Yes         | 147.683733   |
| HIRIP3        | 9.551635144  | 3.780603195 | 0.011521049 |             |              |
| AL133318.1    | 6.440140517  | 2.560815103 | 0.011907319 |             |              |
| EBF4          | -5.548953873 | 2.236712868 | 0.013106873 |             |              |
| STK19         | -6.187960276 | 2.497349255 | 0.013219103 |             |              |
| KLK9          | 7.445469689  | 3.021542907 | 0.01373469  |             |              |
| LDLRAD1       | -6.168198325 | 2.507907132 | 0.013913058 |             |              |
| RP11-286N22.8 | -12.40226723 | 5.071199628 | 0.014460016 |             |              |
| TMEM98        | -5.575459537 | 2.313044558 | 0.015933209 |             |              |
| BCL2L2-PABPN1 | -9.081941629 | 3.775641011 | 0.0161546   |             |              |
| FAM161A       | -5.736601756 | 2.387883485 | 0.016288811 |             |              |
| PRG2          | 7.635331191  | 3.184684908 | 0.016506686 | Yes         | 746.7807167  |
| CLRN2         | -3.692613355 | 1.55098501  | 0.017274234 |             |              |
| FAM209A       | 7.979877674  | 3.356107405 | 0.017420133 | Yes         | -253.5093072 |
| FAM73A        | -5.826168895 | 2.450703892 | 0.017437765 |             |              |
| C2orf78       | -3.343866593 | 1.408522957 | 0.017595431 |             |              |

|               |              |             |             |     |              |
|---------------|--------------|-------------|-------------|-----|--------------|
| DCDC2         | -3.597962309 | 1.520894596 | 0.017996597 |     |              |
| CYP11A1       | -7.592120663 | 3.209937866 | 0.018020706 |     |              |
| RPS23         | -4.882922709 | 2.065339628 | 0.018067951 | Yes | -515.7754902 |
| FRAT1         | 11.39986187  | 4.831335104 | 0.018296246 |     |              |
| KRTAP20-3     | 8.248579786  | 3.495835997 | 0.018297398 |     |              |
| IFI16         | 3.924722434  | 1.667297238 | 0.018575466 |     |              |
| RNF212B       | -5.300117901 | 2.258034264 | 0.018913752 |     |              |
| ZNF582        | -7.724914315 | 3.297193392 | 0.019135756 | Yes | -171.4423481 |
| RP11-108K14.8 | -5.714041472 | 2.441037142 | 0.019241169 |     |              |
| NHP2          | 8.092304175  | 3.467946419 | 0.019624168 | Yes | 214.8224221  |
| TP53BP1       | -6.878408778 | 2.947884956 | 0.01963047  |     |              |
| MMP24-AS1     | -6.991244131 | 3.004319316 | 0.019961845 |     |              |
| TMEM86B       | -5.749422031 | 2.471494856 | 0.020002907 |     |              |
| SOWAHB        | -5.077960111 | 2.187843374 | 0.020287445 |     |              |
| VIM           | 4.986385904  | 2.150812633 | 0.020429059 |     |              |
| ANGEL1        | -7.137009699 | 3.08353227  | 0.020637215 | Yes | 329.5263597  |
| ZNF846        | -6.123376591 | 2.65497209  | 0.021089365 |     |              |
| OR51L1        | 8.626081854  | 3.753011862 | 0.021536619 | Yes | -39.15858667 |
| RHNO1         | 17.08123695  | 7.437352965 | 0.0216369   |     |              |
| HIST1H4G      | 8.728164954  | 3.815977647 | 0.022180164 |     |              |
| OR2T1         | 9.027968445  | 3.949014739 | 0.022246545 |     |              |
| FBXO5         | 4.063570193  | 1.790551527 | 0.023240872 |     |              |
| C7orf33       | -4.337689304 | 1.911492951 | 0.023252049 |     |              |
| PIWIL3        | -7.833525494 | 3.455903629 | 0.02340805  |     |              |
| AHSP          | 8.716414934  | 3.848258825 | 0.023510946 |     |              |
| GOLGA6D       | -3.25782412  | 1.439741359 | 0.02364899  |     |              |
| OR2T34        | 5.877303555  | 2.598139412 | 0.02368998  |     |              |
| TCTN2         | -4.017409456 | 1.776674269 | 0.023747098 |     |              |
| GALNTL5       | -4.948853779 | 2.190992007 | 0.023900344 |     |              |
| OR9G4         | 6.833080301  | 3.027423543 | 0.024004249 |     |              |
| E2F4          | 5.191736365  | 2.300315072 | 0.024010105 |     |              |
| ID1           | 7.682406422  | 3.406413161 | 0.024115926 |     |              |
| RNF181        | 9.026433453  | 4.008343077 | 0.024327872 |     |              |
| NT5C3B        | -7.070293009 | 3.14328071  | 0.024491156 |     |              |
| DEFB113       | 6.773911272  | 3.016379855 | 0.024722656 |     |              |
| RP11-1021N1.1 | -4.878079977 | 2.177856767 | 0.025100439 |     |              |
| MRPL24        | 9.947360295  | 4.453150364 | 0.025497521 |     |              |
| RP3-382I10.7  | -5.120883909 | 2.297616212 | 0.025828464 |     |              |
| C5orf15       | -5.016999932 | 2.25148596  | 0.025860109 |     |              |
| MRPL16        | 5.704324879  | 2.566338986 | 0.026232796 |     |              |
| HOXD13        | -4.864623929 | 2.190702215 | 0.026379595 |     |              |
| CCS           | -5.683630334 | 2.560671121 | 0.026446869 |     |              |
| AC003002.4    | -6.931693918 | 3.124795095 | 0.026535236 |     |              |

|                |              |             |             |     |              |
|----------------|--------------|-------------|-------------|-----|--------------|
| ENPP4          | 3.705800491  | 1.671098894 | 0.026583278 |     |              |
| MLH1           | -6.964633994 | 3.14505504  | 0.026796378 |     |              |
| ADAL           | -5.040519586 | 2.278857253 | 0.026976146 |     |              |
| RP11-407N17.3  | -5.117422287 | 2.315557713 | 0.027103971 |     |              |
| ATP6V0A4       | -4.601497603 | 2.086938136 | 0.027460853 |     |              |
| DUSP23         | 8.575932492  | 3.889503987 | 0.027461741 |     |              |
| RNASE3         | 6.342764518  | 2.879141522 | 0.027594363 |     |              |
| SDCCAG3        | 4.312711592  | 1.958043407 | 0.027625649 |     |              |
| LILRA2         | 7.364967501  | 3.359746449 | 0.028370841 |     |              |
| PMCH           | 7.338028015  | 3.350164242 | 0.028498955 |     |              |
| TSPAN17        | 4.32262521   | 1.974742641 | 0.028600021 |     |              |
| RAP2B          | 7.782300897  | 3.565895413 | 0.029078148 |     |              |
| CTD-2132N18.3  | -4.042682496 | 1.85245708  | 0.029084795 |     |              |
| VPS16          | -6.478808263 | 2.970292525 | 0.029168472 |     |              |
| C6orf229       | 7.301851427  | 3.349951661 | 0.029280553 |     |              |
| SMYD5          | -6.8995006   | 3.170510924 | 0.029544205 |     |              |
| CLLU1OS        | 6.98510722   | 3.212760174 | 0.029691893 |     |              |
| LMO2           | 3.205931138  | 1.475053779 | 0.029747714 |     |              |
| HIST1H2AE      | 5.265865352  | 2.42362466  | 0.029801162 | Yes | 198.4275331  |
| DGAT1          | 3.168147226  | 1.458302095 | 0.029818697 |     |              |
| SOAT2          | -5.872928538 | 2.707855743 | 0.030094197 |     |              |
| HIST2H2AA4.dup | 18.99809798  | 8.79691233  | 0.030801129 |     |              |
| HIST1H2BC      | 18.99809798  | 8.79691233  | 0.030801129 |     |              |
| UBE2W          | 18.99809798  | 8.79691233  | 0.030801129 |     |              |
| TMEM141        | 18.99809798  | 8.79691233  | 0.030801129 |     |              |
| KLK8           | 18.99809798  | 8.79691233  | 0.030801129 |     |              |
| PCDH20         | 10.97794005  | 5.083244453 | 0.030801129 |     |              |
| SPATA2         | 5.830523931  | 2.699915689 | 0.03080979  | Yes | 711.8483084  |
| MRPS10         | -7.186576969 | 3.340287364 | 0.031437967 |     |              |
| ITPRIP         | 3.494109877  | 1.624794273 | 0.031516182 |     |              |
| HIST1H2AG      | 6.368184423  | 2.963073794 | 0.031619987 | Yes | 107.0218765  |
| SVOPL          | -4.167494946 | 1.947242794 | 0.032338362 |     |              |
| AC131935.1     | 5.462485115  | 2.558608255 | 0.032765592 |     |              |
| RP11-96O20.4   | -9.418288786 | 4.415497968 | 0.032924139 |     |              |
| TNIP1          | 3.498734471  | 1.640366801 | 0.032933124 |     |              |
| TSRM           | -13.17695507 | 6.182182258 | 0.03305285  | Yes | -257.8392518 |
| KRT31          | -6.758491223 | 3.172072079 | 0.033120174 | Yes | -513.7996564 |
| NSA2           | -5.707081585 | 2.680526729 | 0.033246848 |     |              |
| THY1           | 6.885836926  | 3.237635989 | 0.033435865 |     |              |
| FHDC1          | 5.705777999  | 2.687298285 | 0.033733783 |     |              |
| GPX3           | 6.03244691   | 2.841231714 | 0.033738755 |     |              |
| RP11-2C24.9    | 6.91336959   | 3.257602879 | 0.033818763 |     |              |
| SLC25A17       | -6.070489439 | 2.864971494 | 0.03410183  |     |              |

|              |              |             |             |     |              |
|--------------|--------------|-------------|-------------|-----|--------------|
| TPRG1L       | -7.118936651 | 3.361318863 | 0.034183552 |     |              |
| CFAP73       | -7.40265952  | 3.498218038 | 0.034334351 |     |              |
| TRIM62       | -7.147930696 | 3.379396511 | 0.034417161 |     |              |
| C3orf80      | 5.494697     | 2.600580632 | 0.034611626 |     |              |
| C20orf24     | 9.152927543  | 4.336891065 | 0.034816919 |     |              |
| RDH5         | 20.8231222   | 9.8912624   | 0.03527358  | Yes | -718.6279484 |
| HSPB1        | -4.199344932 | 1.996321769 | 0.035418495 |     |              |
| C1QTNF9      | 6.713871608  | 3.19344966  | 0.035519264 |     |              |
| IFI44L       | 2.611329875  | 1.242320677 | 0.035555263 |     |              |
| PHGR1        | -2.98926211  | 1.425656031 | 0.036014604 |     |              |
| TTC28        | -3.63683131  | 1.737138268 | 0.036297751 |     |              |
| PDSS1        | 6.874196659  | 3.287403078 | 0.036521607 | Yes | -509.9673467 |
| HOXD3        | 3.559036067  | 1.703866696 | 0.036725767 |     |              |
| TAGLN        | 5.65437756   | 2.709660427 | 0.03691095  |     |              |
| TCEA3        | -8.115325213 | 3.899285811 | 0.037412516 |     |              |
| GOLGA6A      | -3.511825306 | 1.688253205 | 0.037511483 |     |              |
| FCGR3B       | 4.533271374  | 2.182195942 | 0.037765606 |     |              |
| BIRC5        | 6.468206209  | 3.113755616 | 0.03777383  |     |              |
| TCL1B        | -3.79691472  | 1.827859342 | 0.037778799 |     |              |
| ZNF556       | -3.188589424 | 1.537925261 | 0.038143826 |     |              |
| GTSF1L       | 4.945994144  | 2.386247743 | 0.038199488 |     |              |
| AC107021.1   | 5.741689392  | 2.771108301 | 0.038267023 |     |              |
| JPH4         | -5.329150354 | 2.576461628 | 0.03860253  | Yes | -342.3813776 |
| RP11-287D1.3 | -4.463845431 | 2.158346768 | 0.038623283 |     |              |
| DFNB59       | -6.170737867 | 2.987371726 | 0.038865542 |     |              |
| RPL8         | 7.582317912  | 3.670894216 | 0.038873504 |     |              |
| FRG2B        | -4.719065341 | 2.286500741 | 0.039029005 |     |              |
| PCCB         | -7.802133838 | 3.790757765 | 0.039571035 |     |              |
| TCFL5        | 5.530354058  | 2.693977564 | 0.040086328 |     |              |
| KRT32        | -5.674849176 | 2.764724839 | 0.040112266 |     |              |
| DNAJC5G      | -3.835899718 | 1.870910141 | 0.04033659  |     |              |
| SPRYD3       | 5.635290164  | 2.752614917 | 0.04063357  |     |              |
| PFKFB2       | 6.015589711  | 2.938463706 | 0.04063956  |     |              |
| ANO1         | -3.777514539 | 1.84656759  | 0.040786364 |     |              |
| ERVK3-1      | 9.062182686  | 4.43083139  | 0.040829666 |     |              |
| RP11-176H8.1 | -5.179558964 | 2.534753326 | 0.04101114  |     |              |
| DLX6         | 4.860951193  | 2.378942346 | 0.041020325 |     |              |
| SPINT1       | 5.722803079  | 2.800746928 | 0.041021447 |     |              |
| TBP          | -5.224978144 | 2.560094877 | 0.041257641 |     |              |
| SHANK2       | -2.36091255  | 1.157335142 | 0.041354727 |     |              |
| WNT6         | -5.072419941 | 2.489866179 | 0.041627407 |     |              |
| IGSF22       | -6.559079674 | 3.219978313 | 0.041650545 |     |              |
| STARD4       | 2.837537981  | 1.397101343 | 0.042253168 |     |              |

|              |              |             |             |     |              |
|--------------|--------------|-------------|-------------|-----|--------------|
| AOC2         | 4.641765938  | 2.286189072 | 0.042320888 |     |              |
| E2F1         | 6.256979537  | 3.085482545 | 0.042572788 |     |              |
| SFT2D1       | 6.26376576   | 3.090853685 | 0.042708579 |     |              |
| HIST3H2A     | 6.654784158  | 3.287265374 | 0.042927631 |     |              |
| TPST1        | -6.632791876 | 3.282967497 | 0.043345565 |     |              |
| AL353791.1   | 4.664164513  | 2.313965226 | 0.04383566  |     |              |
| RPF2         | -6.22296974  | 3.088982081 | 0.043949754 |     |              |
| ABCF2        | 6.046506926  | 3.002150175 | 0.044003362 |     |              |
| ZNF69        | -5.044073003 | 2.505244732 | 0.044072009 |     |              |
| GBP1         | 3.72523028   | 1.852148502 | 0.044293551 |     |              |
| ARHGDIB      | 3.302932416  | 1.643219372 | 0.044427229 |     |              |
| CBLN3        | 6.799699846  | 3.384517705 | 0.044530749 |     |              |
| C9orf47      | 5.796800238  | 2.888772092 | 0.044785257 |     |              |
| AGO1         | -6.337642761 | 3.17516892  | 0.045933731 |     |              |
| KRT33A       | -5.451571821 | 2.73472144  | 0.046210539 |     |              |
| RPL13        | 7.159104567  | 3.591570137 | 0.046227759 |     |              |
| LRRFIP1      | 5.813960244  | 2.91716558  | 0.046259599 |     |              |
| GCSAM        | 7.273102441  | 3.65029215  | 0.046319368 |     |              |
| GATA3        | 4.842872979  | 2.432086804 | 0.046454307 |     |              |
| SERPINC1     | -5.802420247 | 2.914416929 | 0.046487823 |     |              |
| CYB5A        | 5.26809177   | 2.646291765 | 0.046508942 |     |              |
| GART         | -4.160966973 | 2.093683972 | 0.046879175 |     |              |
| NF2          | -3.833477508 | 1.929574154 | 0.046956081 |     |              |
| OR5M3        | 6.843010025  | 3.445247218 | 0.047009188 |     |              |
| PKP2         | -3.580007054 | 1.802637737 | 0.047035264 |     |              |
| HMGA1        | 4.547621018  | 2.290311864 | 0.047078835 |     |              |
| TAF11        | 5.077868331  | 2.559634996 | 0.047275333 |     |              |
| MICALCL      | -5.79083747  | 2.921720692 | 0.047479736 |     |              |
| PRB4         | -3.933557599 | 1.984792745 | 0.047496252 | Yes | -336.1885262 |
| GLYATL2      | -4.101482369 | 2.072663458 | 0.047833316 |     |              |
| AC025263.3   | 8.483661235  | 4.287566756 | 0.047853658 |     |              |
| POPDC2       | 4.996858319  | 2.526879556 | 0.047987196 |     |              |
| IAH1         | 8.62647414   | 4.362902739 | 0.048015328 |     |              |
| CYB5R1       | 5.843898418  | 2.957764744 | 0.04817947  |     |              |
| H2AFY2       | -6.092149456 | 3.087372491 | 0.048467393 |     |              |
| RP11-507M3.1 | -4.099629306 | 2.081310131 | 0.048868755 |     |              |
| C4B          | -2.836499517 | 1.44015551  | 0.048886683 |     |              |
| RP3-468K18.7 | 6.044039705  | 3.069957212 | 0.048979507 |     |              |
| WFDC3        | -3.710726706 | 1.886516656 | 0.049186361 |     |              |
| FAM43B       | 5.394724832  | 2.744002909 | 0.049297974 |     |              |
| CD1D         | 5.892911955  | 3.000279782 | 0.049516083 |     |              |
| MAFB         | 5.261265962  | 2.680874033 | 0.049702102 |     |              |
| PRMT9        | 4.839474062  | 2.46714551  | 0.049812783 |     |              |

SETD6

5.128301331 2.614499147 0.049822452 Yes

821.6842827



**Table S3. Enriched KEGG pathways in the candidate genes associated with clinical events.**

| Term                                  | Count | %           | PValue      | Genes                                                                    | Fold Enrichment | FDR         |
|---------------------------------------|-------|-------------|-------------|--------------------------------------------------------------------------|-----------------|-------------|
| hsa05322:Systemic lupus erythematosus | 8     | 0.036140224 | 7.61E-04    | HIST1H2BC, HIST1H2AG, C4B, HIST1H2AE, H2AFY2, HIST3H2A, FCGR3B, HIST1H4G | 5.198564141     | 0.869603473 |
| hsa03010:Ribosome                     | 6     | 0.027105168 | 0.018724151 | MRPL24, RPL13, MRPL16, RPL8, MRPS10, RPS23                               | 3.841586001     | 19.50525891 |
| hsa05034:Alcoholism                   | 6     | 0.027105168 | 0.049907099 | HIST1H2BC, HIST1H2AG, HIST1H2AE, H2AFY2, HIST3H2A, HIST1H4G              | 2.951727097     | 44.43906013 |
